# Supplementary material
Source: MDPI journal article supplement (https://www.mdpi.com/2073-4344/12/1/83)
Supplement: s1 [file s1]

# Supplementary Material

Cellulose modified with BINAP support Rh as an efficient heterogeneous catalyst for asymmetric hydrogenation

Cuiping Yu<sup>1</sup>, Weilong Wu<sup>2</sup>, Min Gao,<sup>1\*</sup> Yu Liu<sup>1\*</sup>

1 State key Laboratory of Bio-based Material and Green Papermaking, Qilu University of Technology, Jinan, Shandong, 250353, PR China

2 College of Chemistry and Chemical Engineering, Luoyang Normal University, Luoyang, 471934, P. R. of China

Corresponding Author:

\*E-mail: leoliuyu@163.com (Yu Liu); shdgaomin@whu.edu.cn (Min Gao)

## NMR spectra

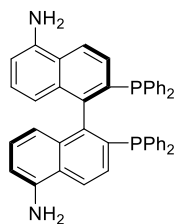

### *R*-5,5'-diamino Binap:

$^1\text{H}$  NMR (400 MHz,  $\text{CDCl}_3$ )  $\delta$  7.88 (d,  $J = 8.7$  Hz, 2H), 7.44 – 7.39 (m, 2H), 7.21 (d,  $J = 6.7$  Hz, 2H), 7.13 (td,  $J = 13.6, 6.6$  Hz, 18H), 6.80 (t,  $J = 7.9$  Hz, 2H), 6.68 (d,  $J = 7.3$  Hz, 2H), 6.40 (d,  $J = 8.4$  Hz, 2H), 4.43 – 3.73 (m, 4H).

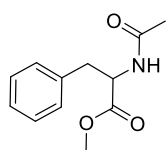

### methyl acetylphenylalaninate:

$^1\text{H}$  NMR (400 MHz,  $\text{CDCl}_3$ )  $\delta$  7.33 – 7.26 (m, 3H), 7.10 (d,  $J = 6.7$  Hz, 2H), 5.93 (s, 1H), 4.91 (dd,  $J = 13.5, 5.8$  Hz, 1H), 3.75 (s, 3H), 3.14 (qd,  $J = 13.9, 5.7$  Hz, 2H), 2.00 (s, 3H).

## NMR spectra of *R*-5,5'-diamino Binap

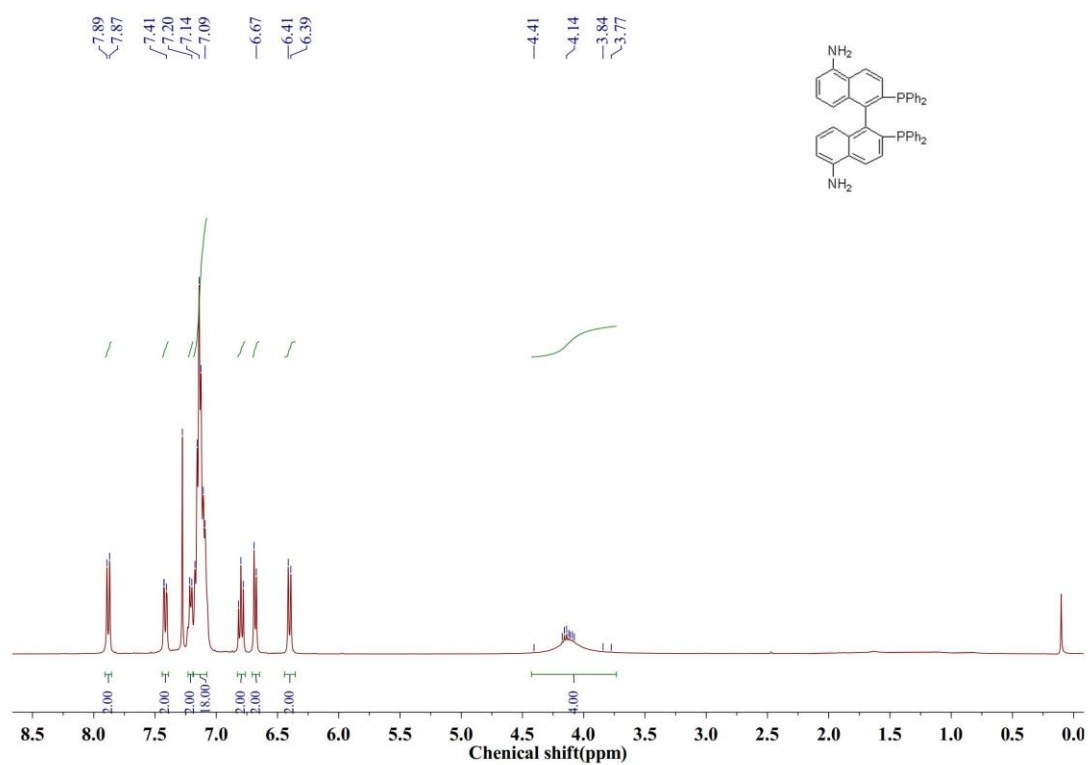

## NMR spectra of methyl acetylphenylalaninate

yucuiping2021.12.22  
2021.12.22.9

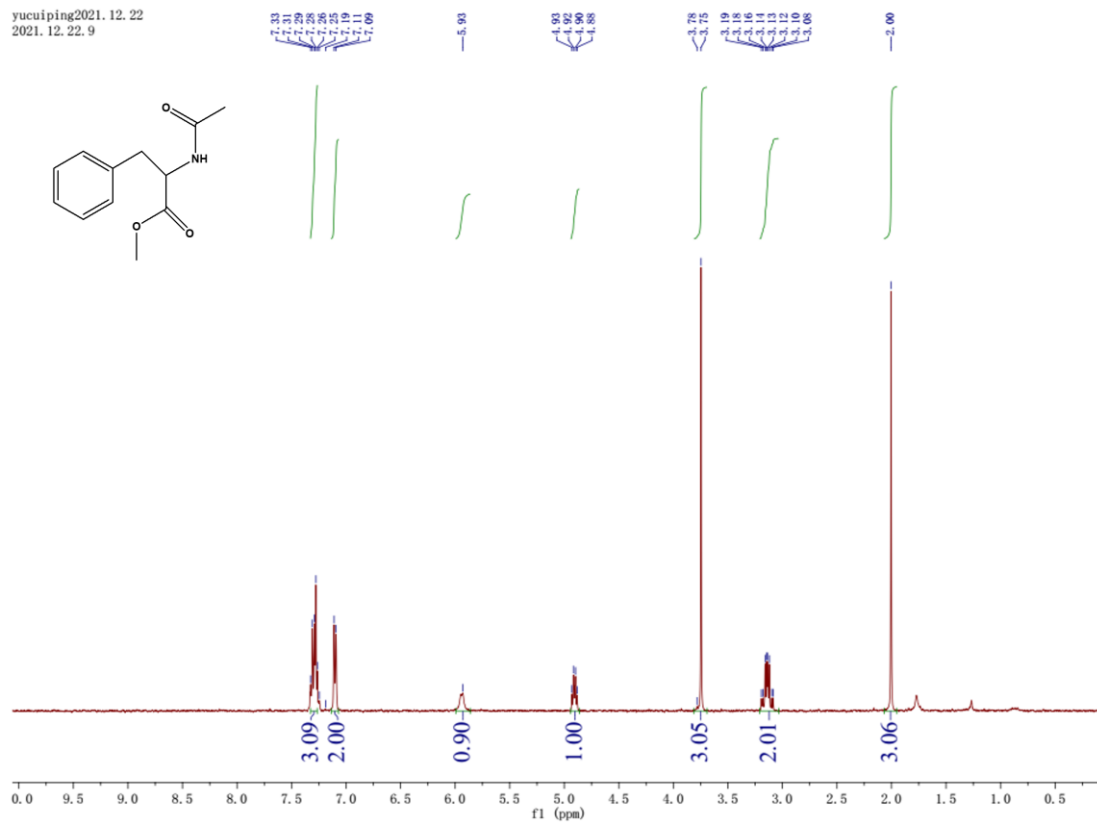

## NMR spectra of 23% conversion

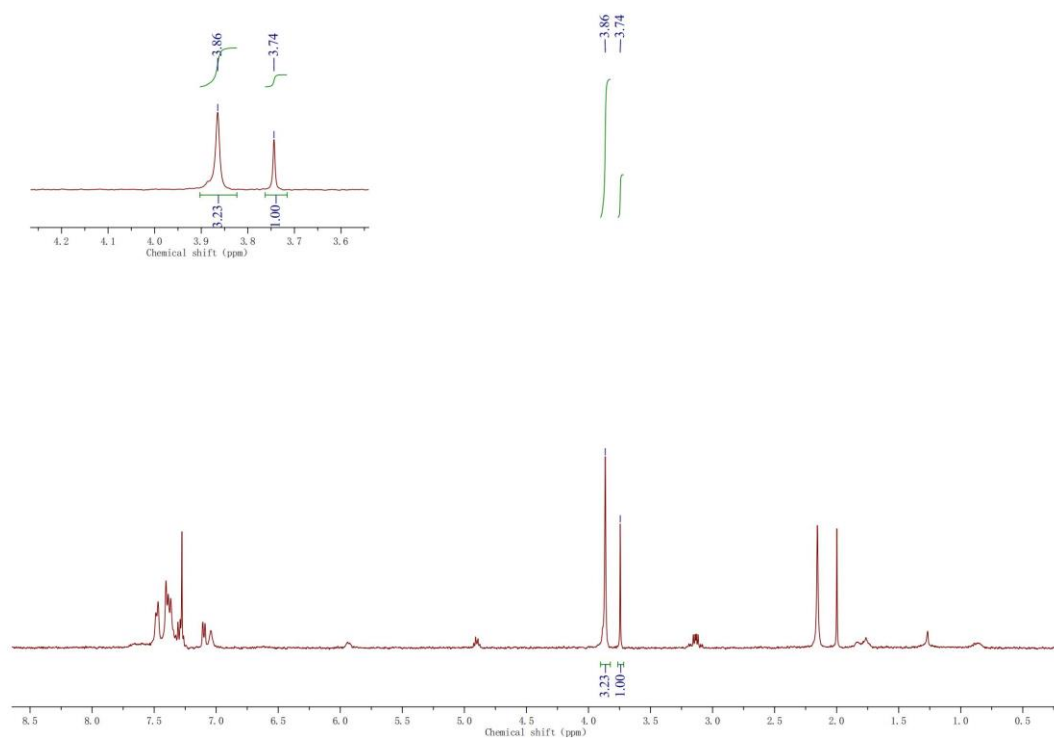

## NMR spectra of 37% conversion

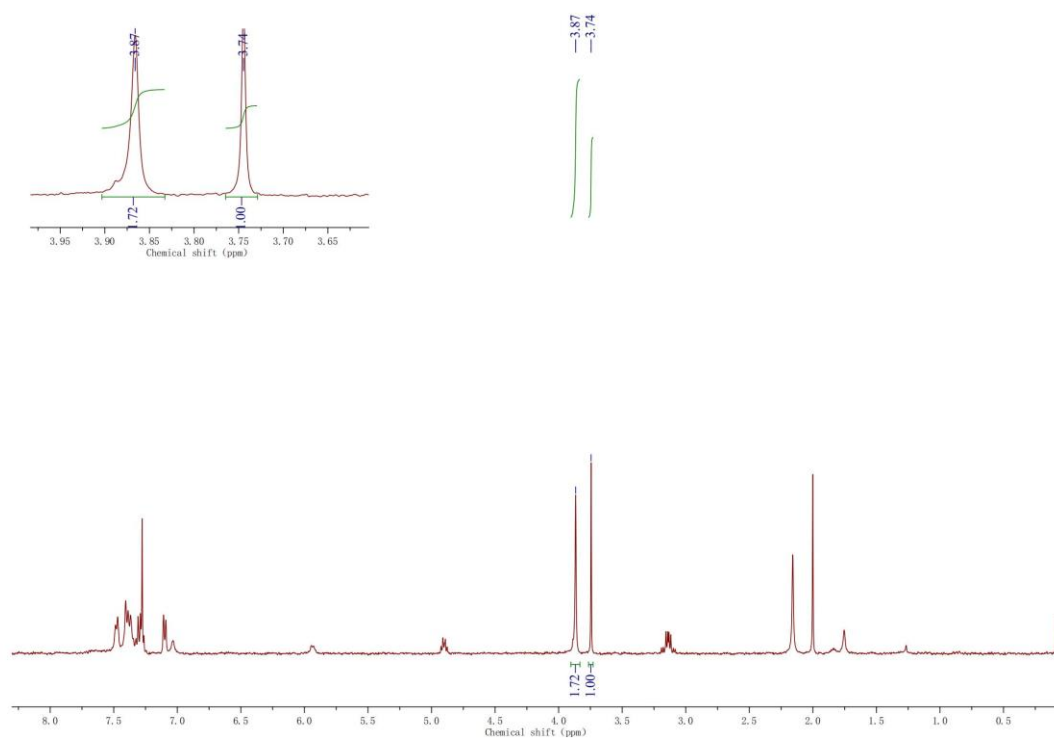

## NMR spectra of 45% conversion

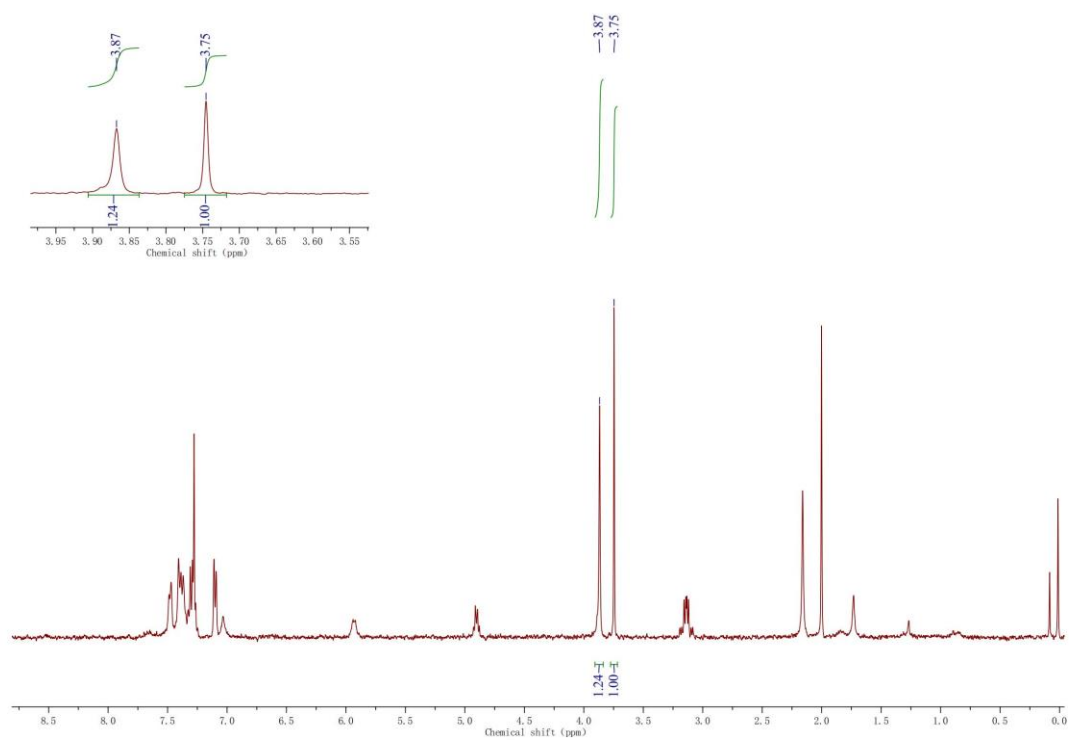

## NMR spectra of 48% conversion

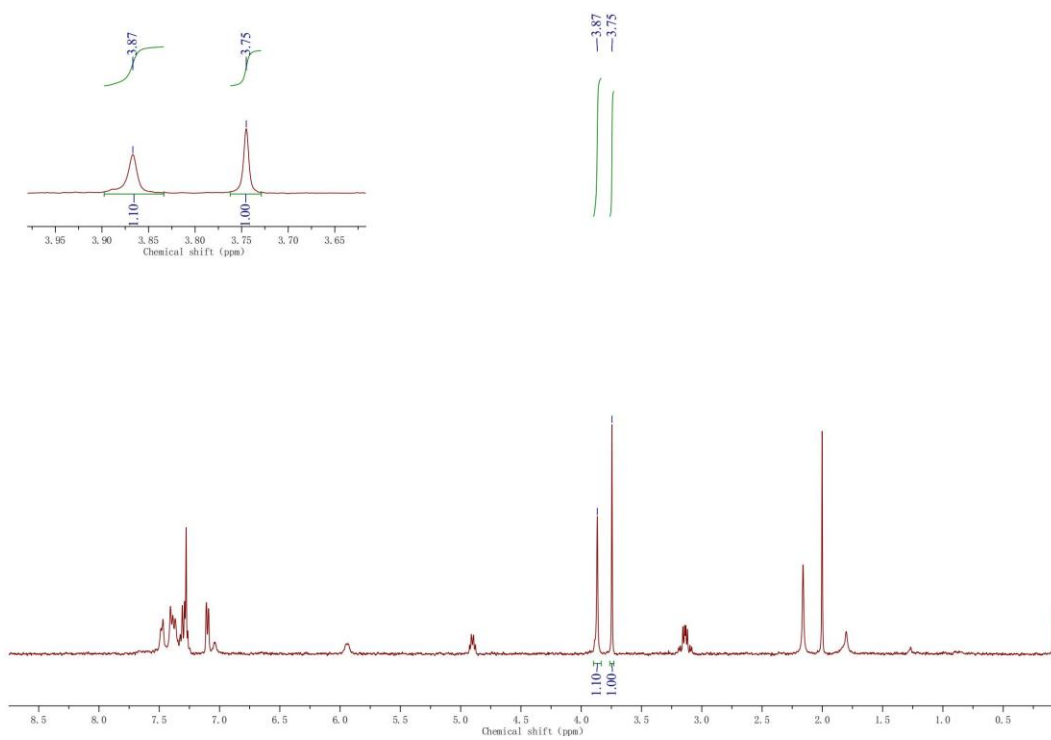



## NMR spectra of 54% conversion

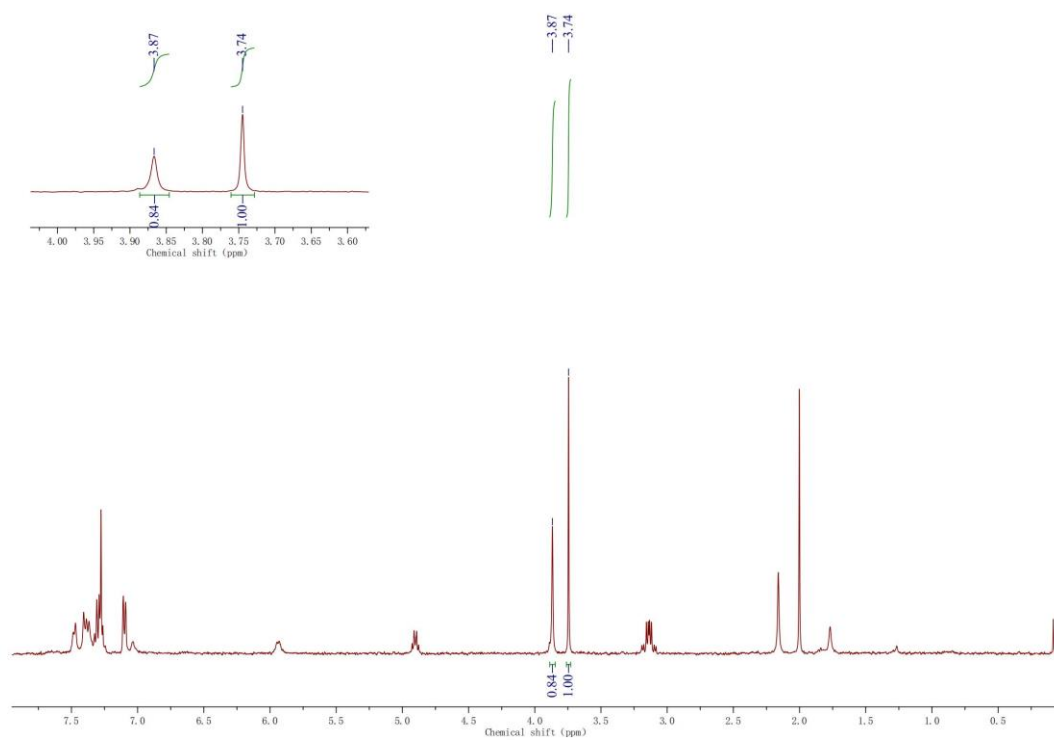

## NMR spectra of 56% conversion

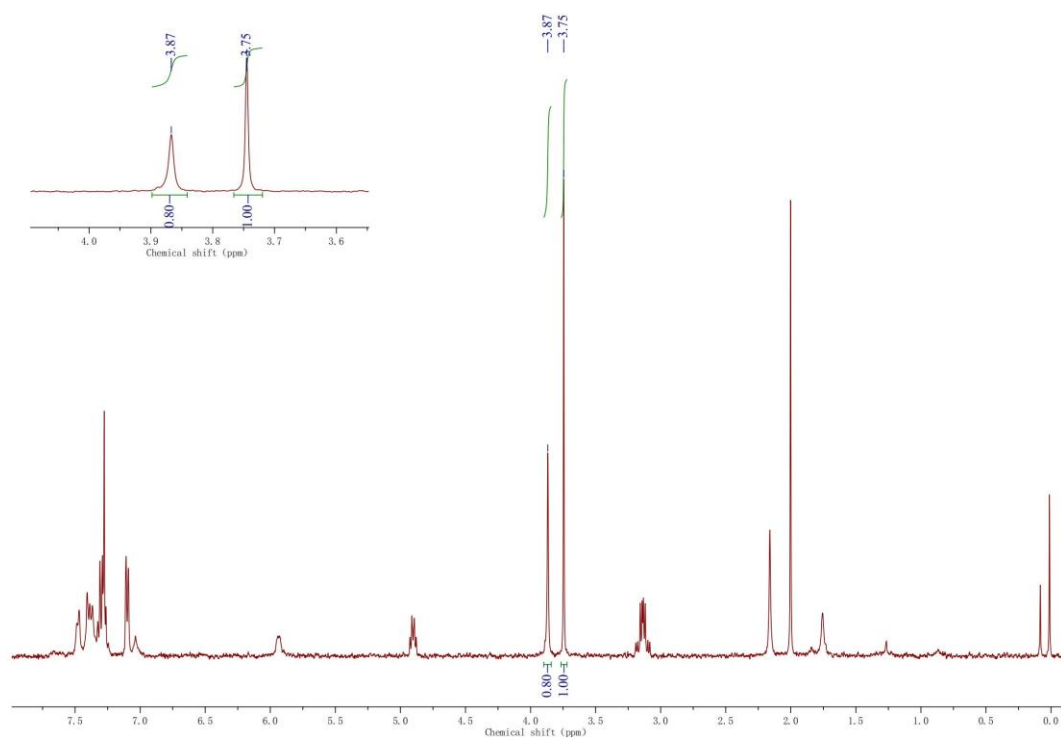

## NMR spectra of 57% conversion

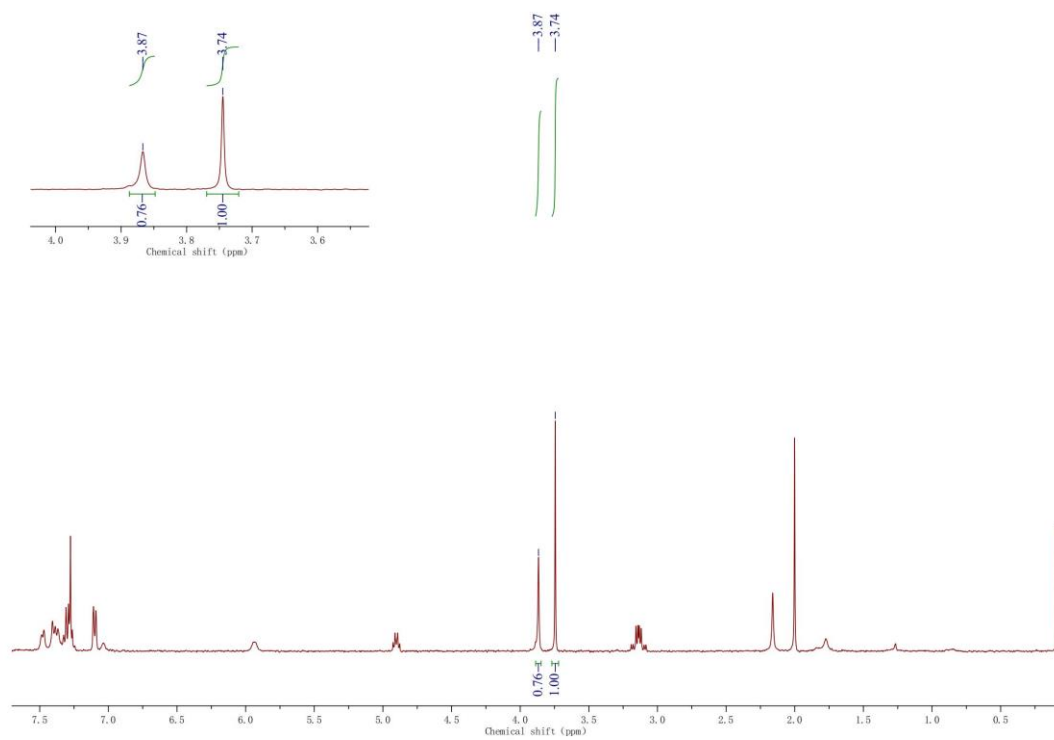

## NMR spectra of 65% conversion

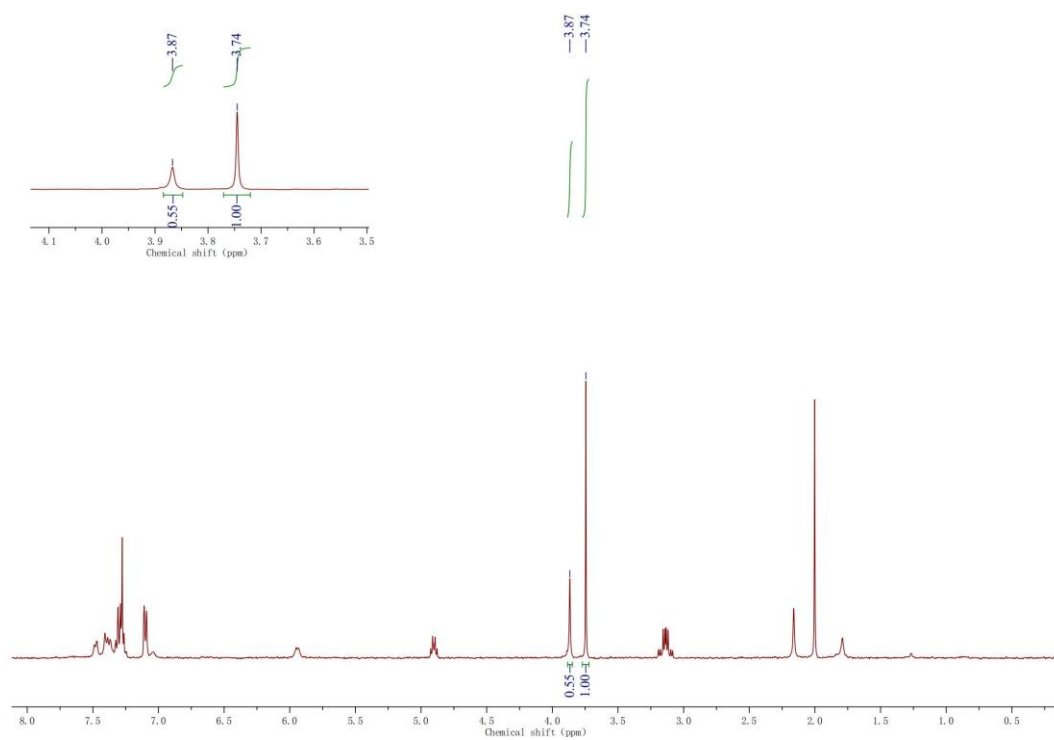

## HPLC spectra of Table 1

### Racemate

2021-9-9 17:30:51 1 / 1

#### ==== Shimadzu LCsolution analysis report ====

Acq.Operator : Admin  
Acq.Instrument : GM-XICIANAN-RAC  
Acq.ID :  
Acq. : 1  
Seq.Line# : 3  
Inj Volume. : 5 uL  
Sample name : GM-XICIANAN-RAC.lcd  
Acq.Method. : wwl-90-10-210-1-30min-OD.lcm  
Data Collection : 2021 3-30 16:13:41  
Data Processing : 2021 3-30 16:43:44

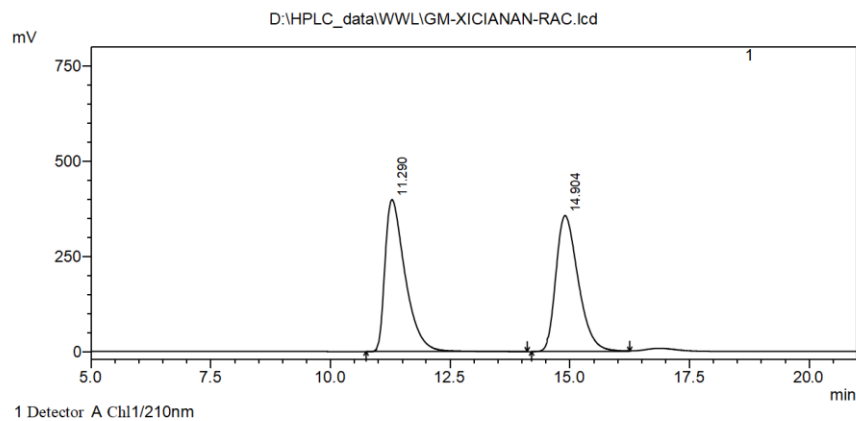

#### Area Percent Report

| Peak#  | RetTime | Area     | Area %  |
|--------|---------|----------|---------|
| 1      | 11.290  | 11681852 | 50.402  |
| 2      | 14.904  | 11495525 | 49.598  |
| Totals |         | 23177377 | 100.000 |

D:\HPLC\_data\WWL\GM-XICIANAN-RAC.lcd

## Table 1-entry1

Date File: d:\Chem32\1\Data\YCP 2021-12-26 11-09-58\001-1.D

Sample Name: 20211226YCP-1

```
=====
Acq. Operator   : Admin
Acq.           : 1
Instrument      : 1260
Entry date     : 2021/12/26 11:11:26
Inj            : 1
Inj Volume.    : 5.000 µl
Acq. Method.   : d:\Chem32\1\Data\YCP 2021-12-26 11-09-58\YCP.M
Analysis Method : d:\Chem32\1\Data\YCP 2021-12-26 11-09-58\YCP.M
                (Sequence Method)
Last Changed   : 2021/12/26 11:12:15 : AM by SYSTEM(modified
                after loading)
Additional Info : Peak(s) manually integrated
```

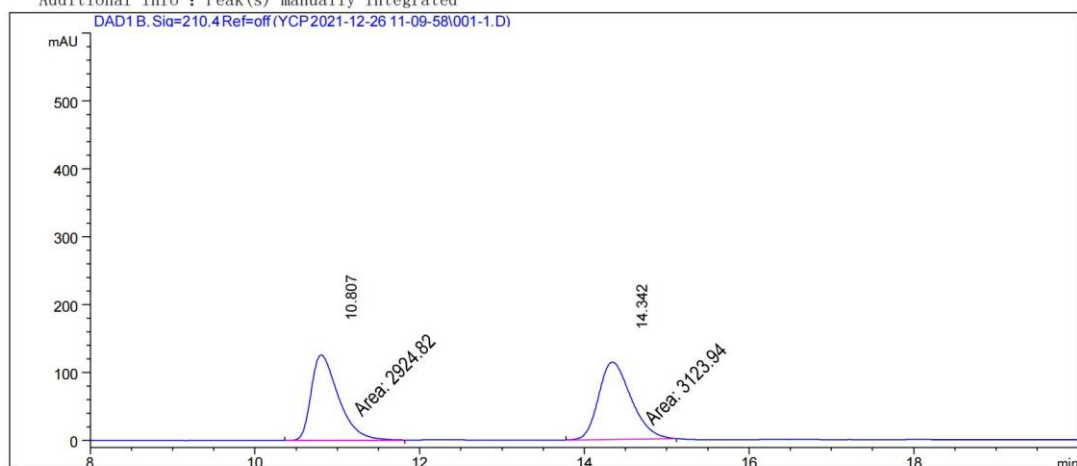

### Area Percent Report

```
=====
Sorted By      : Signal
Multiplier     : 1.0000
Dilution       : 1.0000
DO not use Multiplier & Dilution Factor with ISTDs
signal 1: DAD1 B, Sig=210,4 Ref=off
```

| Peak # | RetTime [min] | Type | Width [min] | Area [mAU*s] | Height [mAU] | Area %  |
|--------|---------------|------|-------------|--------------|--------------|---------|
| 1      | 10.807        | MM   | 0.3871      | 2924.82104   | 125.93480    | 48.3541 |
| 2      | 14.342        | MM   | 0.4572      | 3123.93994   | 113.88740    | 51.6459 |

Totals : 6048.76099 239.82220

\*\*\* End of Report \*\*\*

## Table 1-entry2

2021-9-9 16:16:03 1 / 1

### ==== Shimadzu LCsolution analysis report ====

Acq.Operator : Admin  
 Acq.Instrument : wwl-2-84-01  
 Acq.ID :  
 Acq. : 1  
 Seq.Line# : 2  
 Inj Volume : 2 uL  
 Sample name : wwl-2-84-01.lcd  
 Acq.Method : wwl-90-10-210-1-25min-OD.lcm  
 Data Collection : 2021 9-5 14:39:46  
 Data Processing : 2021 9-5 15:04:48

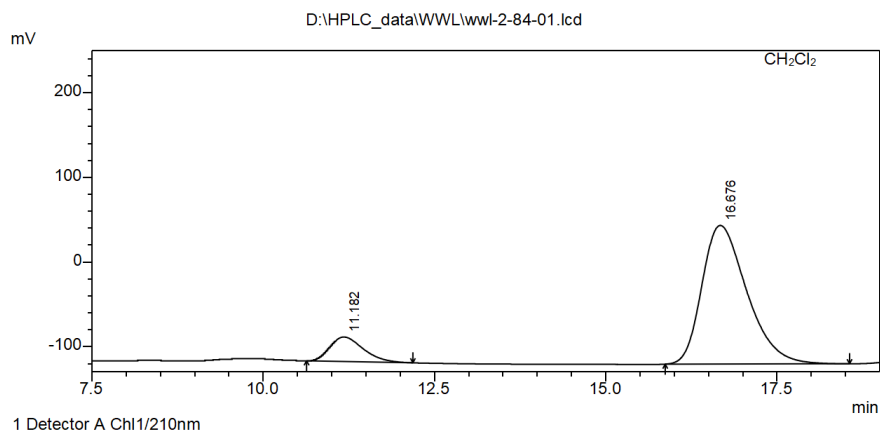

Area Percent Report

| Peak#  | RetTime | Area    | Area %  |
|--------|---------|---------|---------|
| 1      | 11.182  | 987850  | 11.677  |
| 2      | 16.676  | 7471666 | 88.323  |
| Totals |         | 8459517 | 100.000 |

D:\HPLC\_data\WWL\wwl-2-84-01.lcd

## Table 1-entry3

2021-9-9 16:30:45 1 / 1

### ==== Shimadzu LCsolution analysis report ====

Acq.Operator : Admin  
Acq.Instrument : wwl-2-84-2  
Acq.ID :  
Acq. : 1  
Seq.Line# : 3  
Inj Volume. : 5 uL  
Sample name : wwl-2-84-01.lcd  
Acq.Method : wwl-90-10-210-1-25min-OD.lcm  
Data Collection : 2021 9-4 16:15:34  
Data Processing : 2021 9-9 16:19:42

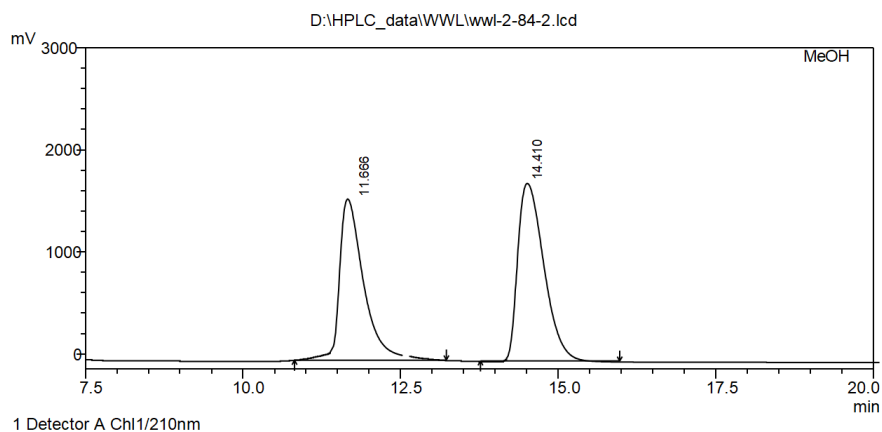

#### Area Percent Report

| Peak#  | RetTime | Area     | Area%   |
|--------|---------|----------|---------|
| 1      | 11.666  | 42076576 | 45.347  |
| 2      | 14.410  | 50711834 | 54.653  |
| Totals |         | 92788411 | 100.000 |

D:\HPLC\_data\WWL\wwl-2-84-2.lcd



# Table 1-entry4

2021-9-9 16:32:52 1 / 1

## ==== Shimadzu LCsolution analysis report ====

Acq.Operator : Admin  
 Acq.Instrument : wwl-2-84-3  
 Acq.ID :  
 Acq. : 1  
 Seq.Line# : 4  
 Inj Volume : 5 uL  
 Sample name : wwl-2-84-3.lcd  
 Acq.Method : wwl-90-10-210-1-25min-OD.lcm  
 Data Collection : 2021 9-4 16:40:59  
 Data Processing : 2021 9-4 17:06:02

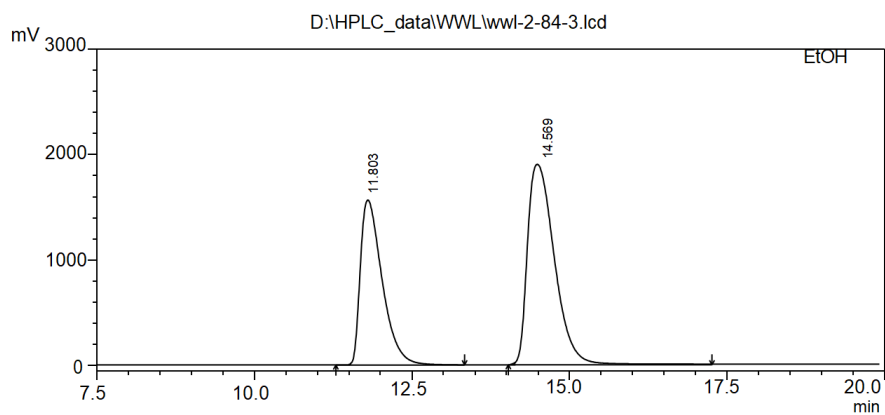

1 Detector A Ch11/210nm

### Area Percent Repc

| Peak#  | RetTime | Area     | Area%   |
|--------|---------|----------|---------|
| 1      | 11.803  | 37669700 | 40.336  |
| 2      | 14.569  | 55720684 | 59.664  |
| Totals |         | 93390384 | 100.000 |

D:\HPLC\_data\WWL\wwl-2-84-3.lcd

# Table 1-entry5

2021-9-9 16:54:25 1 / 1

## ==== Shimadzu LCsolution analysis report ====

采集人 : Admin  
 样品名称 : ww1-2-84-8  
 样品 ID :  
 样品架 : 1  
 样品瓶# : 9  
 进样体积 : 2 uL  
 数据文件名 : ww1-2-84-8.lcd  
 方法文件名 : ww1-90-10-210-1-25min-OD-td.lcm  
 批处理文件名 : ww1-gm01-2-84.lcb  
 报告文件名 : Default.lcr  
 数据采集 : 2021 9-5 15:56:08  
 数据处理 : 2021 9-5 16:21:11  
 Acq.Operator : Admin  
 Acq.Instrument : ww1-2-84-8  
 Acq.ID :  
 Acq. : 1  
 Seq.Line# : 9  
 Inj.Volume : 5 uL  
 Sample name : ww1-2-84-8.lcd  
 Acq.Method : ww1-90-10-210-1-25min-OD.lcm  
 Data Collection : 2021 9-5 15:56:08  
 Data Processing : 2021 9-5 16:21:11

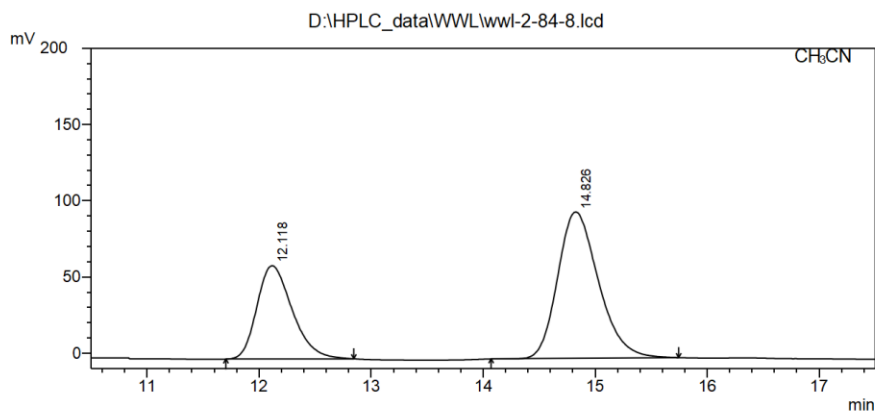

### Area Percent Report

| Peak#  | RetTime | Area    | Area%   |
|--------|---------|---------|---------|
| 1      | 12.118  | 1341924 | 35.560  |
| 2      | 14.826  | 2431734 | 64.440  |
| Totals |         | 3773658 | 100.000 |

D:\HPLC\_data\WWL\ww1-2-84-8.lcd

# Table 1-entry6

2021-9-9 16:45:55 1 / 1

## ==== Shimadzu LCsolution analysis report ====

Acq.Operator : Admin  
 Acq.Instrument : wwl-2-84-3  
 Acq.ID :  
 Acq. : 1  
 Seq.Line# : 6  
 Inj Volume. : 5 uL  
 Sample name : wwl-2-84-5.lcd  
 Acq.Method. : wwl-90-10-210-1-25min-OD.lcm  
 Data Collection : 2021 9-4 17:31:55  
 Data Processing : 2021 9-4 17:56:58

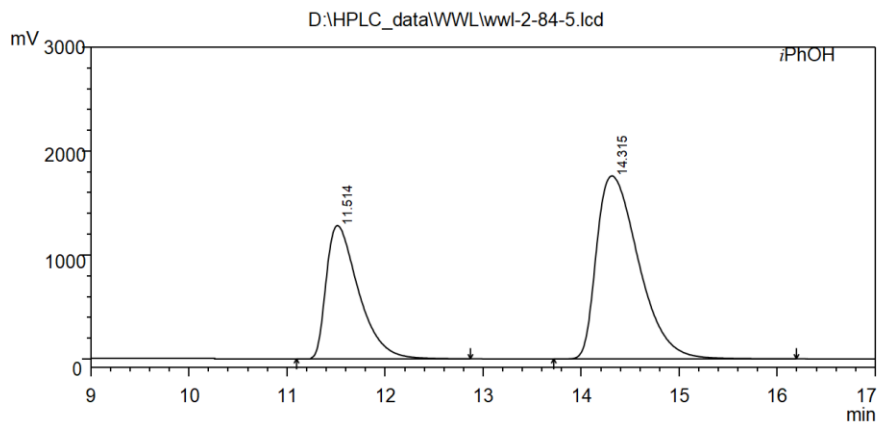

### Area Percent Report

| Peak#  | RetTime | Area     | Area%   |
|--------|---------|----------|---------|
| 1      | 11.514  | 29423776 | 35.859  |
| 2      | 14.315  | 52629883 | 64.141  |
| Totals |         | 82053659 | 100.000 |

D:\HPLC\_data\WWL\wwl-2-84-5.lcd

# Table 1-entry7

2021-9-9 16:49:18 1 / 1

## ==== Shimadzu LCsolution analysis report ====

Acq.Operator : Admin  
 Acq.Instrument : wwl-2-84-3  
 Acq.ID :  
 Acq. : 1  
 Seq.Line# : 7  
 Inj Volume : 5 uL  
 Sample name : wwl-2-84-06.lcd  
 Acq.Method : wwl-90-10-210-1-25min-OD.lcm  
 Data Collection : 2021 9-5 15:05:12  
 Data Processing : 2021 9-5 15:30:17

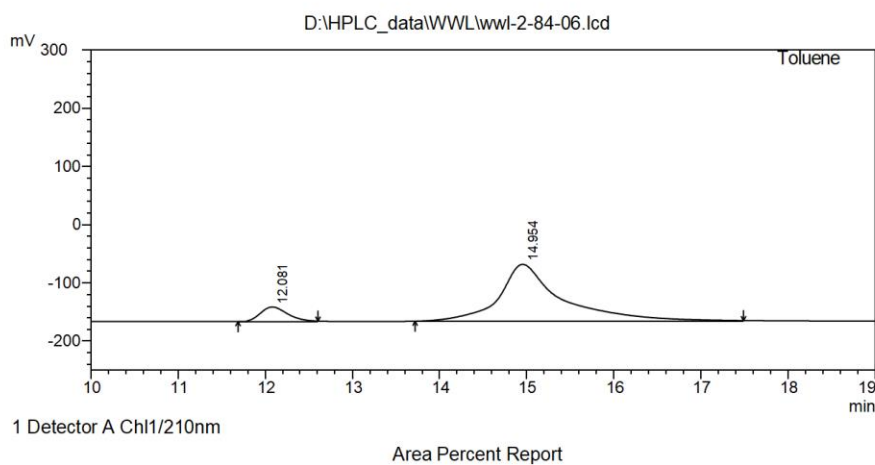

| Peak#  | RetTime | Area    | Area%   |
|--------|---------|---------|---------|
| 1      | 12.081  | 528552  | 9.966   |
| 2      | 14.954  | 4775090 | 90.034  |
| Totals |         | 5303642 | 100.000 |

D:\HPLC\_data\WWL\wwl-2-84-06.lcd

# Table 1-entry8

2021-9-9 16:51:46 1 / 1

## ==== Shimadzu LCsolution analysis report ====

Acq.Operator : Admin  
 Acq.Instrument : wwl-2-84-7  
 Acq.ID :  
 Acq. : 1  
 Seq.Line# : 8  
 Inj Volume. : 5 uL  
 Sample name : wwl-2-84-7.lcd  
 Acq.Method : wwl-90-10-210-1-25min-OD.lcm  
 Data Collection : 2021 9-5 15:30:42  
 Data Processing : 2021 9-5 15:55:44

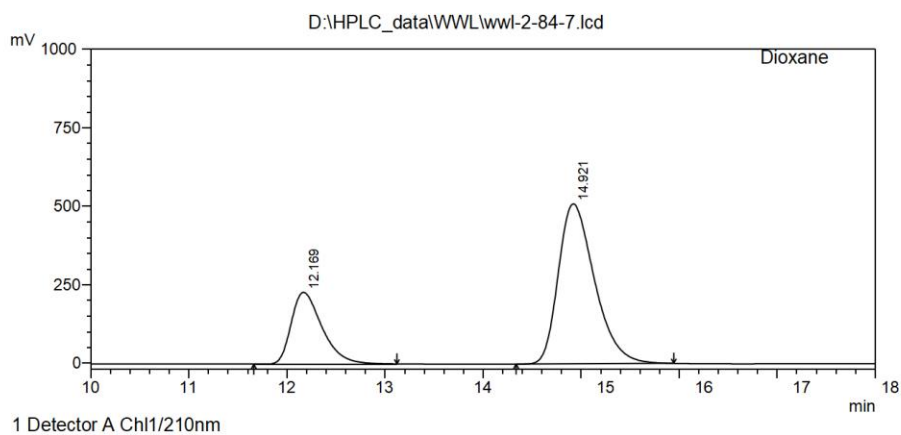

### Area Percent Report

| Peak#  | RetTime | Area     | Area%   |
|--------|---------|----------|---------|
| 1      | 12.169  | 5022026  | 27.704  |
| 2      | 14.921  | 13105326 | 72.296  |
| Totals |         | 18127352 | 100.000 |

D:\HPLC\_data\WWL\wwl-2-84-7.lcd

# Table 1-entry9

2021-9-9 16:36:11 1 / 1

## ==== Shimadzu LCsolution analysis report ====

Acq.Operator : Admin  
 Acq.Instrument : wwl-2-84-3  
 Acq.ID :  
 Acq. : 1  
 Seq.Line# : 5  
 Inj.Volume : 5 uL  
 Sample name : wwl-2-84-4.lcd  
 Acq.Method : wwl-90-10-210-1-25min-OD.lcm  
 Data Collection : 2021 9-4 17:06:27  
 Data Processing : 2021 9-4 17:31:30

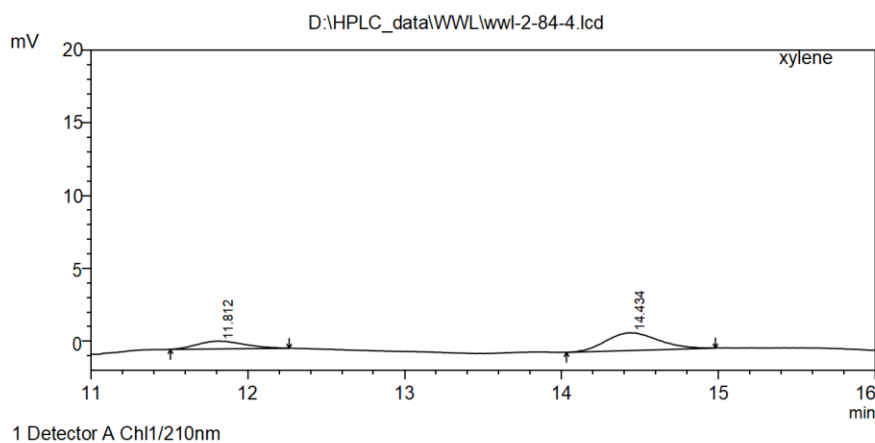

### Area Percent Report

| Peak#  | RetTime | Area  | Area%   |
|--------|---------|-------|---------|
| 1      | 11.812  | 11123 | 28.257  |
| 2      | 14.434  | 28241 | 71.743  |
| Totals |         | 39364 | 100.000 |

D:\HPLC\_data\WWL\wwl-2-84-4.lcd

## Table 1-entry10

Date File: d:\Chem32\1\Data\YCP 2021-12-26 17-45-21\001-1-76%.D  
Sample Name: 20211225-GM-1

```
=====
Acq. Operator   : Admin                      Acq.       : 1
Instrument      : 1260                      Location  : 1
Entry date     : 2021/12/26 17:46:48        Inj       : 1
Inj Volume     : 5.000 µl
Acq. Method    : d:\Chem32\1\Data\YCP 2021-12-26 17-45-21\YCP.M
Analysis Method : 2021/12/26 17:45:45
Analysis Method.: d:\Chem32\1\Data\YCP 2021-12-26 17-45-21\YCP.M (Sequence
Method)
Last Changed   : 2021/12/26 19:06:53 : AM by SYSTEM(modified
after loading)
Additional Info : Peak(s) manually integrated
=====
```

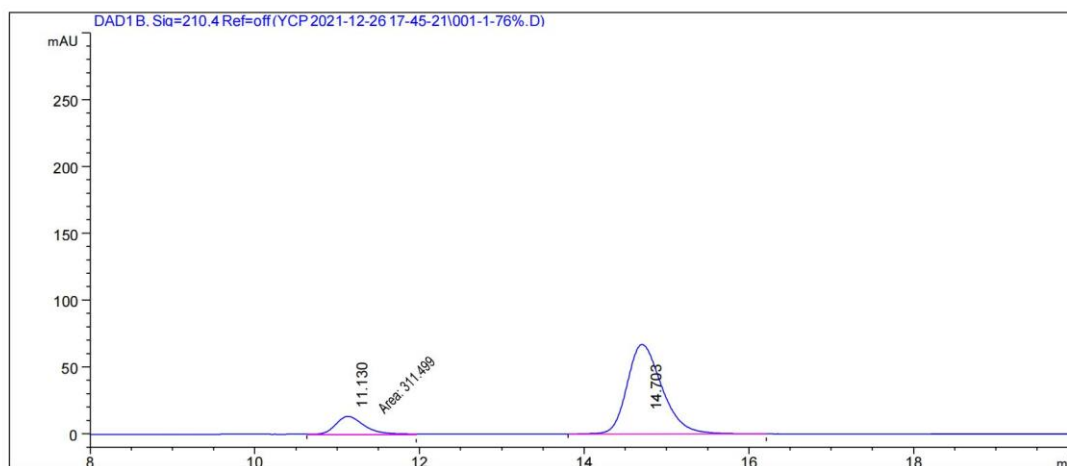

### Area Percent Report

```
=====
Sorted By      : Signal
Multiplier     : 1.0000
Dilution       : 1.0000
DO not use Multiplier & Dilution Factor with ISTDs
signal 1: DAD1 B, Sig=210,4 Ref=off
=====
```

| Peak # | RetTime [min] | Type | Width [min] | Area [mAU*s] | Height [mAU] | Area %  |
|--------|---------------|------|-------------|--------------|--------------|---------|
| 1      | 11.130        | MM   | 0.3910      | 311.49854    | 13.27631     | 13.5764 |
| 2      | 14.703        | BB   | 0.4531      | 1982.90503   | 67.03899     | 86.4236 |

Totals : 2294.40356 80.31530

\*\*\* End of Report \*\*\*

## HPLC spectra of Table 2

### standard solution

Date File: d:\Chem32\1\Data\YCP 2021-12-26 11-09-58\001-1-standard.D

Sample Name: standard

```
=====
Acq. Operator   : Admin                      Acq.       : 1
Instrument      : 1260                      Location  : 1
Entry date     : 2021/12/26 11:11:26        Inj       : 1
Inj Volume     : 5.000 µl
Acq. Method    : d:\Chem32\1\Data\YCP 2021-12-26 11-09-58\YCP.M
Analysis Method: d:\Chem32\1\Data\YCP 2021-12-26 11-09-58\YCP.M (Sequence
Method)
Last Changed   : 2021/12/26 15:37:18 : AM by SYSTEM(modified after
loading)
Additional Info : Peak(s) manually integrated
=====
```

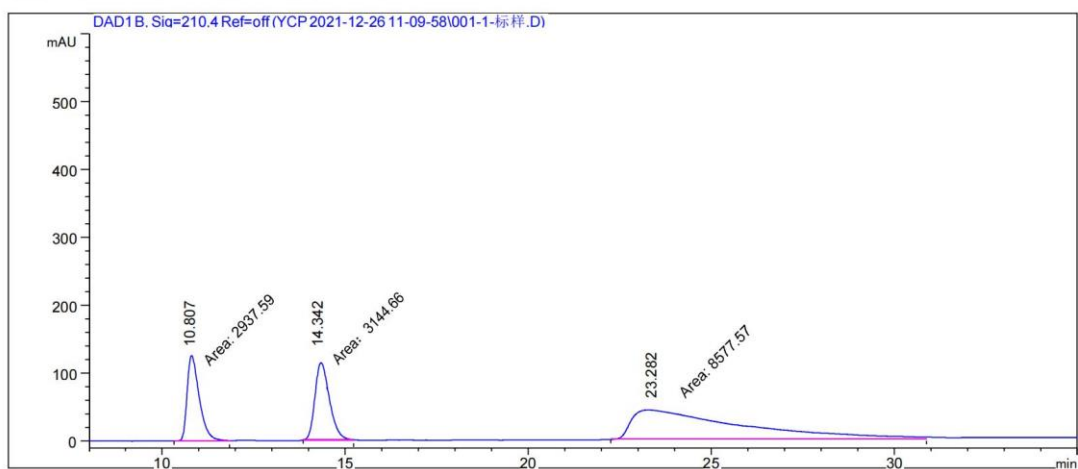

#### Area Percent Report

```
=====
Sorted By      : Signal
Multiplier     : 1.0000
Dilution       : 1.0000
DO not use Multiplier & Dilution Factor with ISTDs
signal 1: DAD1 B, Sig=210,4 Ref=off
=====
```

| Peak #   | RetTime [min] | Type | Width [min] | Area [mAU*s] | Height [mAU] | Area %  |
|----------|---------------|------|-------------|--------------|--------------|---------|
| 1        | 10.807        | MM   | 0.3882      | 2937.59424   | 126.13116    | 20.0384 |
| 2        | 14.342        | MM   | 0.4600      | 3144.65796   | 113.94315    | 21.4509 |
| 3        | 23.282        | MM   | 2.2841      | 8577.57129   | 43.92063     | 58.5107 |
| Totals : |               |      |             | 1.46598e4    | 283.99495    |         |

\*\*\* 报告结束 \*\*\*



## Table 2- Cycle 1

Date File: d:\Chem32\1\Data\YCP 2021-12-26 22-29-43\001-1-76%.D  
Sample Name: GM-1

=====

|                 |                                                                    |          |     |
|-----------------|--------------------------------------------------------------------|----------|-----|
| Acq. Operator   | : Admin                                                            | Acq.     | : 1 |
| Instrument      | : 1260                                                             | Location | : 1 |
| Entry date      | : 2021/12/26 22:31:10                                              | Inj:     | 1   |
| Inj Volume.     | : 5.000 µl                                                         |          |     |
| Acq. Method.    | : d:\Chem32\1\Data\YCP 2021-12-26 22-29-43\YCP.M                   |          |     |
| Analysis Method | : d:\Chem32\1\Data\YCP 2021-12-26 22-29-43\YCP.M (Sequence Method) |          |     |

Last Changed : 2021/12/26 23:14:57 : AM by SYSTEM(modified after loading)

Additional Info : Peak(s) manually integrated

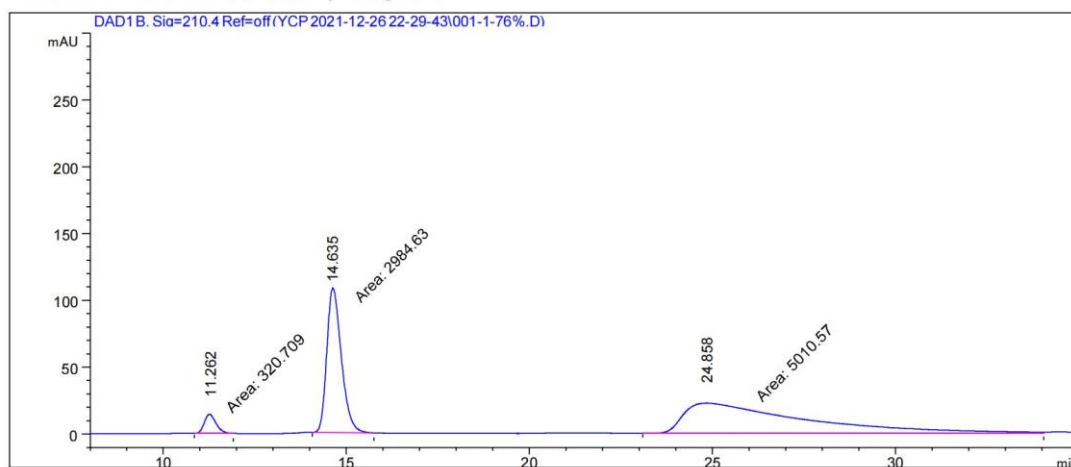

### Area Percent Report

Sorted By : Signal  
Multiplier : 1.0000  
Dilution : 1.0000  
DO not use Multiplier & Dilution Factor with ISTDs  
signal 1: DAD1 B, Sig=210,4 Ref=off

| Peak # | RetTime [min] | Type | Width [min] | Area [mAU*s] | Height [mAU] | Area %  |
|--------|---------------|------|-------------|--------------|--------------|---------|
| 1      | 11.262        | MM   | 0.3724      | 320.70917    | 14.35367     | 3.8566  |
| 2      | 14.635        | MM   | 0.4605      | 2984.62866   | 108.02036    | 35.8906 |
| 3      | 24.858        | MM   | 3.6967      | 5010.56885   | 22.59050     | 60.2528 |
| Totals | :             |      |             | 8315.90668   | 144.96454    |         |

\*\*\* End of Report \*\*\*

## Table 2- Cycle 2

Date File: d:\Chem32\1\Data\YCP 2021-12-26 21-51-37\001-1-76%.D  
Sample Name: GM-2

=====

Acq. Operator : Admin Acq. : 1  
Instrument : 1260 Location : 1  
Entry date : 2021/12/26 21:53:03 Inj : 1  
Inj Volume. : 5.000 µl  
Acq. Method. : d:\Chem32\1\Data\YCP 2021-12-26 21-51-37\YCP.M  
Analysis Method : d:\Chem32\1\Data\YCP 2021-12-26 21-51-37\YCP.M (Sequence Method)  
Last Changed : 2021/12/26 22:35:28 : AM by SYSTEM(modified after loading)  
Additional Info : Peak(s) manually integrated

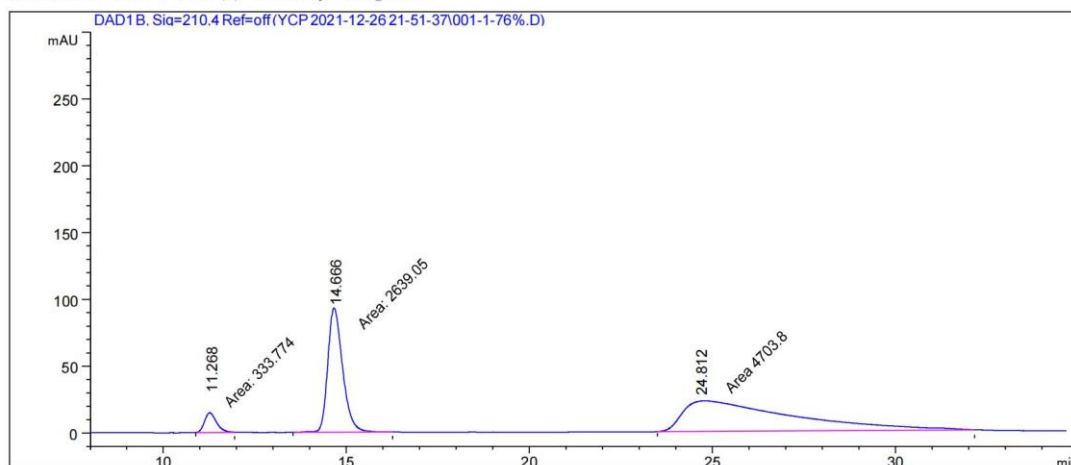

### Area Percent Report

Sorted By : Signal  
Multiplier : 1.0000  
Dilution : 1.0000  
DO not use Multiplier & Dilution Factor with ISTDs  
signal 1: DAD1 B, Sig=210,4 Ref=off

| Peak #   | RetTime [min] | Type | Width [min] | Area [mAU*s] | Height [mAU] | Area %  |
|----------|---------------|------|-------------|--------------|--------------|---------|
| 1        | 11.268        | MM   | 0.3773      | 333.77365    | 14.74219     | 4.3479  |
| 2        | 14.666        | MM   | 0.4730      | 2639.05347   | 92.99316     | 34.3778 |
| 3        | 24.812        | MM   | 3.4355      | 4703.79883   | 22.81958     | 61.2743 |
| Totals : |               |      |             | 7676.62595   | 130.55493    |         |

\*\*\* End of Report \*\*\*

## Table 2- Cycle 3

Date File: d:\Chem32\1\Data\YCP 2021-12-26 15-12-14\001-1-76%.D  
Sample Name: GM-3

```
=====
Acq. Operator   : Admin                      Acq.       : 1
Instrument      : 1260                      Location    : 1
Entry date     : 2021/12/26 15:13:40        Inj         : 1
Inj Volume.    : 5.000 µl
Acq. Method.   : d:\Chem32\1\Data\YCP 2021-12-26 15-12-14\YCP.M
Analysis Method : d:\Chem32\1\Data\YCP 2021-12-26 15-12-14\YCP.M
                (Sequence Method)
Last Changed   : 2021/12/26 22:10:10 : AM by SYSTEM(modified after
                loading)
Additional Info : Peak(s) manually integrated
=====
```

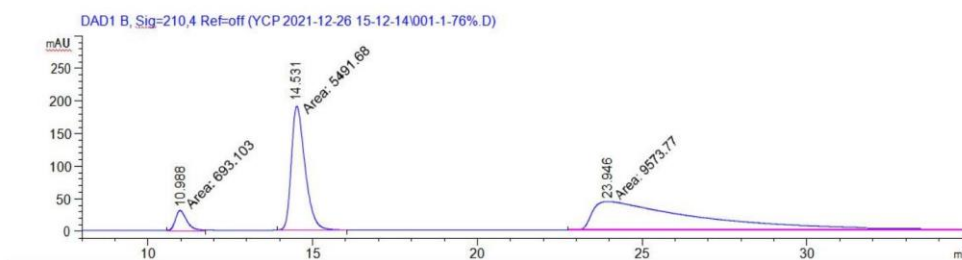

### Area Percent Report

```
=====
Sorted By      : Signal
Multiplier     : 1.0000
Dilution       : 1.0000
DO not use Multiplier & Dilution Factor with ISTDs
signal 1: DAD1 B, Sig=210,4 Ref=off
=====
```

| Peak # | RetTime [min] | Type | Width [min] | Area [mAU*s] | Height [mAU] | Area %  |
|--------|---------------|------|-------------|--------------|--------------|---------|
| 1      | 10.988        | MM   | 0.3803      | 693.10272    | 30.37226     | 4.3983  |
| 2      | 14.531        | MM   | 0.4814      | 5491.68164   | 190.11597    | 34.8489 |
| 3      | 23.946        | MM   | 3.6648      | 9573.77246   | 43.53986     | 60.7529 |

Totals : 1.57586e4 264.02808

\*\*\* End of Report \*\*\*

## Table 2- Cycle 4

Date File: d:\Chem32\1\Data\YCP 2021-12-26 20-28-43\001-1-76%.D  
Sample Name: gm-4

```
=====
Acq. Operator   : Admin                      Acq.       : 1
Instrument      : 1260                      Location    : 1
Entry date     : 2021/12/26 20:30:12        Inj        : 1
Inj Volume     : 5.000 µl
Acq. Method    : d:\Chem32\1\Data\YCP 2021-12-26 20-28-43\YCP.M
Analysis Method : d:\Chem32\1\Data\YCP 2021-12-26 20-28-43\YCP.M
                  (Sequence Method)
Last Changed   : 2021/12/26 21:14:39 : AM by SYSTEM(modified
                  after loading)
Additional Info : Peak(s) manually integrated
=====
```

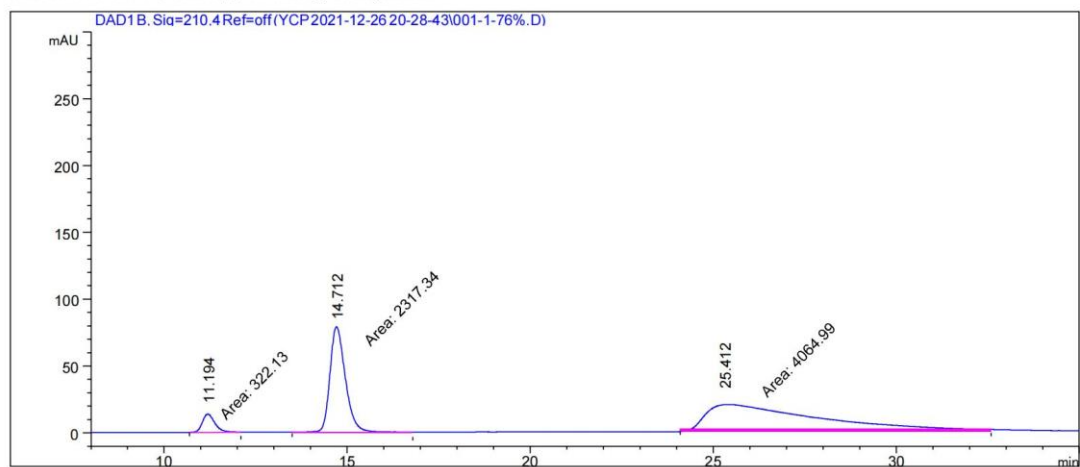

### Area Percent Report

```
=====
Sorted By      : Signal
Multiplier     : 1.0000
Dilution       : 1.0000
DO not use Multiplier & Dilution Factor with ISTDs
signal 1: DAD1 B, Sig=210.4 Ref=off
=====
```

| Peak # | RetTime [min] | Type | Width [min] | Area [mAU*s] | Height [mAU] | Area %  |
|--------|---------------|------|-------------|--------------|--------------|---------|
| 1      | 11.194        | MM   | 0.3931      | 322.13019    | 13.65763     | 4.8047  |
| 2      | 14.712        | MM   | 0.4894      | 2317.34229   | 78.92244     | 34.5642 |
| 3      | 25.412        | MM   | 3.3846      | 4064.98535   | 20.01729     | 60.6311 |

Totals : 6704.45782 112.59735

\*\*\* End of Report \*\*\*

## Table 2- Cycle 5

Date File: d:\Chem32\1\Data\YCP 2021-12-26 16-57-55\001-1-76%.D  
Sample Name:GM-5

=====

Acq. Operator : Admin Acq. : 1  
Instrument : 1260 Location : 1  
Entry date : 2021/12/26 16:59:24 Inj : 1  
Inj Volume. : 5.000 µl  
Acq. Method. : d:\Chem32\1\Data\YCP 2021-12-26 16-57-55\YCP.M  
Analysis Method : d:\Chem32\1\Data\YCP 2021-12-26 16-57-55\YCP.M (Sequence Method)

Last Changed : 2021/12/26 17:44:22 : AM by SYSTEM(modified after loading)

Additional Info : Peak(s) manually integrated

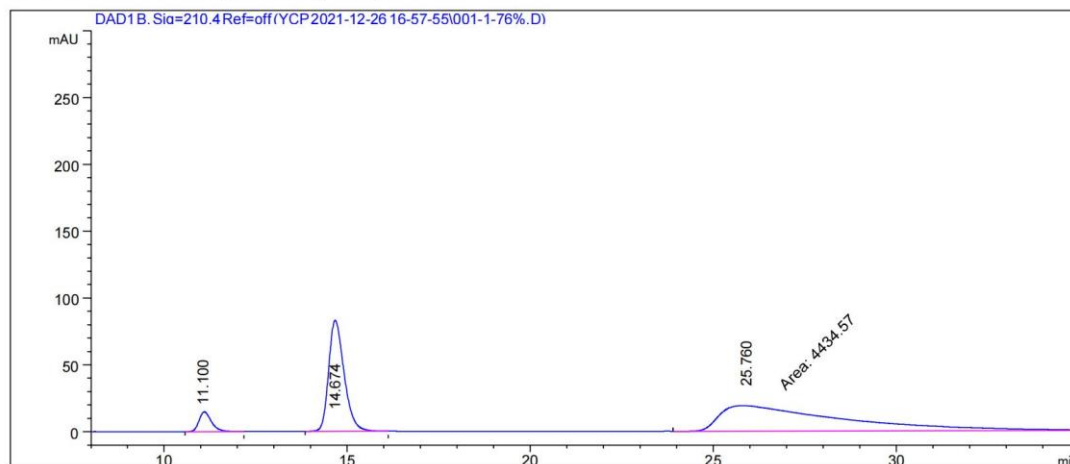

### Area Percent Report

Sorted By : Signal  
Multiplier : 1.0000  
Dilution : 1.0000  
DO not use Multiplier & Dilution Factor with ISTDs  
signal 1: DAD1 B, Sig=210,4 Ref=off

| Peak # | RetTime [min] | Type | Width [min] | Area [mAU*s] | Height [mAU] | Area %  |
|--------|---------------|------|-------------|--------------|--------------|---------|
| 1      | 11.100        | BB   | 0.3580      | 348.62469    | 14.73816     | 4.8201  |
| 2      | 14.674        | BB   | 0.4521      | 2449.56372   | 83.06202     | 33.8676 |
| 3      | 25.760        | MM   | 3.8830      | 4434.56787   | 19.03411     | 61.3123 |

Totals: 7232.75629 116.83429

\*\*\* End of Report \*\*\*

## Table 2- Cycle 6

Date File: d:\Chem32\1\Data\YCP 2021-12-26 19-04-48\001-1-76%.D  
Sample Name: GM-6

=====

|                 |                                                                    |          |     |
|-----------------|--------------------------------------------------------------------|----------|-----|
| Acq. Operator   | : Admin                                                            | Acq.     | : 1 |
| Instrument      | : 1260                                                             | Location | : 1 |
| Entry date      | : 2021/12/26 19:06:14                                              | Inj      | : 1 |
| Inj Volume.     | : 5.000 µl                                                         |          |     |
| Acq. Method.    | : d:\Chem32\1\Data\YCP 2021-12-26 19-04-48\YCP.M                   |          |     |
| Analysis Method | : d:\Chem32\1\Data\YCP 2021-12-26 19-04-48\YCP.M (Sequence Method) |          |     |

Last Changed : 2021/12/26 19:51:41 : AM by SYSTEM(modified after loading)

Additional Info : Peak(s) manually integrated

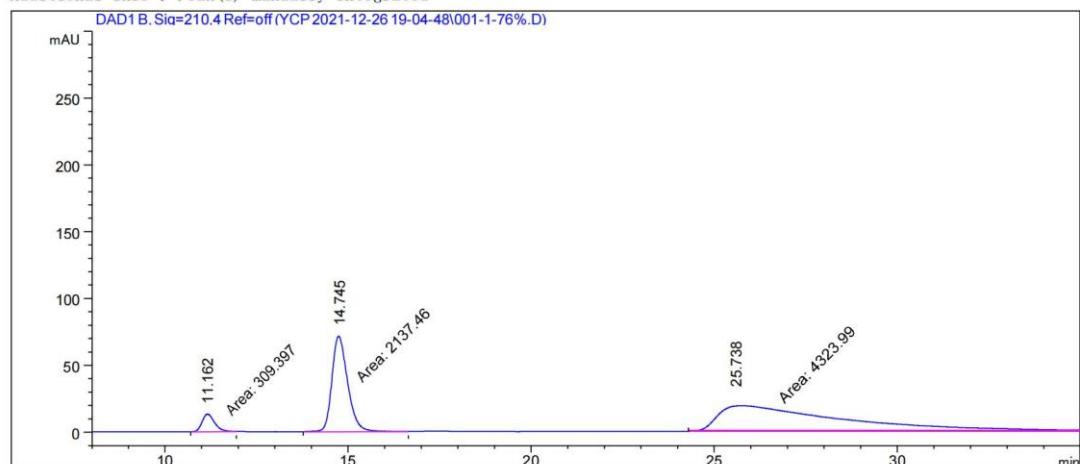

### Area Percent Report

Sorted By : Signal  
Multiplier : 1.0000  
Dilution : 1.0000  
DO not use Multiplier & Dilution Factor with ISTDs  
signal 1: DAD1 B, Sig=210,4 Ref=off

| Peak # | RetTime [min] | Type | Width [min] | Area [mAU*s] | Height [mAU] | Area %  |
|--------|---------------|------|-------------|--------------|--------------|---------|
| 1      | 11.162        | MM   | 0.3927      | 309.39694    | 13.13089     | 4.5695  |
| 2      | 14.745        | MM   | 0.4989      | 2137.45996   | 71.41241     | 31.5686 |
| 3      | 25.738        | MM   | 3.7952      | 4323.98926   | 18.98874     | 63.8619 |

Totals: 6770.84616 103.53205

\*\*\* End of Report \*\*\*
